# Supplementary material for: Microarray Analysis of lncRNA and mRNA Reveals Enhanced Lipolysis Along With Metabolic Remodeling in Mice Infected With Larval Echinococcus granulosus
Source: Front Physiol. 2020 Aug 21;11:1078. doi: 10.3389/fphys.2020.01078 (PMC7472464; doi:10.3389/fphys.2020.01078)
Supplement: Supplementary file 9 [file Table_4.XLSX]

## Sheet: Sheet1
TABLE S4 Significantly and differentially expressed ncRNAs in adiposytes.
ProbeName	P	FC	Regulation	Primary. Accession	Biotype
mmu_gnc084341	0.000697819	13.5875	up	XR_001784800.1	ncRNA
mmu_gnc093555	0.00167549	8.86698	up	XR_865983.1	ncRNA
mmu_bnc085429	0.0449613	8.09799	up	XR_373514.2	ncRNA
mmu_bnc100590	0.00176315	8.02999	up	XR_878695.2	ncRNA
mmu_bnc078562	0.0482483	6.69335	up	XR_001778679.1	ncRNA
mmu_gnc083672	0.00510252	6.51136	up	XR_001784069.1	ncRNA
mmu_gnc089369	0.0088054	5.92008	up	XR_382810.3	ncRNA
mmu_gnc094542	0.00616446	5.88047	up	XR_867671.2	ncRNA
mmu_bnc092277	0.0395137	5.55674	up	XR_389609.3	ncRNA
mmu_bnc085195	0.0215643	4.89529	up	XR_105893.4	ncRNA
mmu_bnc085735	0.0138016	4.57474	up	XR_374198.3	ncRNA
mmu_gnc084342	0.00805161	4.55296	up	XR_001784802.1	ncRNA
mmu_bnc097728	0.0326081	4.54178	up	XR_873393.1	ncRNA
mmu_gnc102469	0.00413299	4.53349	up	XR_882608.1	ncRNA
mmu_bnc085917	0.0438527	4.49663	up	XR_374609.1	ncRNA
mmu_gnc081226	0.00524448	4.353	up	XR_001781485.1	ncRNA
mmu_gnc095168	0.0137571	4.31491	up	XR_868754.2	ncRNA
mmu_bnc099552	0.027889	4.1917	up	XR_876985.2	ncRNA
mmu_bnc101159	0.0143256	4.11733	up	XR_880035.1	ncRNA
mmu_bnc100900	0.0345423	4.1101	up	XR_879362.2	ncRNA
mmu_gnc097156	0.0440844	4.09821	up	XR_872453.1	ncRNA
mmu_bnc089380	0.00757645	3.92299	up	XR_382828.3	ncRNA
mmu_gnc089288	0.00475293	3.87303	up	XR_382638.3	ncRNA
mmu_bnc089656	0.0415684	3.85952	up	XR_383594.2	ncRNA
mmu_gnc099345	0.0291652	3.78951	up	XR_876647.1	ncRNA
mmu_gnc092979	0.0287858	3.76624	up	XR_391566.2	ncRNA
mmu_gnc090990	0.0339244	3.76215	up	XR_386593.2	ncRNA
mmu_gnc080050	0.00307469	3.58603	up	XR_001780214.1	ncRNA
mmu_bnc095746	0.0344573	3.47784	up	XR_869924.1	ncRNA
mmu_bnc093867	0.0392012	3.46531	up	XR_866533.2	ncRNA
mmu_gnc088770	0.0370669	3.46139	up	XR_381412.3	ncRNA
mmu_gnc093868	0.0266318	3.44882	up	XR_866534.2	ncRNA
mmu_gnc097836	0.000496571	3.40091	up	XR_873630.2	ncRNA
mmu_bnc100831	0.0491417	3.39893	up	XR_879232.2	ncRNA
mmu_gnc102227	0.0229105	3.3925	up	XR_882116.2	ncRNA
mmu_bnc032712	0.00797522	3.37319	up	NR_047528.1	ncRNA
mmu_bnc095256	0.00645976	3.32053	up	XR_868960.1	ncRNA
mmu_gnc095167	0.00069719	3.15585	up	XR_868753.2	ncRNA
mmu_gnc090992	0.0427618	3.15544	up	XR_386595.2	ncRNA
mmu_gnc099013	0.0347822	3.13139	up	XR_875988.2	ncRNA
mmu_gnc031871	0.00913097	3.09867	up	NR_040682.1	ncRNA
mmu_gnc080051	0.00409676	3.09707	up	XR_001780215.1	ncRNA
mmu_bnc032126	0.000213073	3.08653	up	NR_045329.1	ncRNA
mmu_bnc099470	0.00223183	3.06304	up	XR_876866.1	ncRNA
mmu_bnc098675	0.0231488	3.02214	up	XR_875374.1	ncRNA
mmu_gnc080048	0.00185699	3.01689	up	XR_001780212.1	ncRNA
mmu_gnc092560	0.018806	2.97703	up	XR_390464.1	ncRNA
mmu_gnc080052	0.00131741	2.92909	up	XR_001780216.1	ncRNA
mmu_gnc099065	0.00162831	2.91743	up	XR_876064.1	ncRNA
mmu_gnc089274	0.0366843	2.86541	up	XR_382617.3	ncRNA
mmu_bnc031018	0.0473966	2.84447	up	NR_033455.1	ncRNA
mmu_bnc083144	0.00997639	2.84274	up	XR_001783523.1	ncRNA
mmu_bnc092102	0.0144871	2.83535	up	XR_389232.3	ncRNA
mmu_gnc097821	0.00390033	2.82586	up	XR_873601.2	ncRNA
mmu_gnc080049	0.00292853	2.81906	up	XR_001780213.1	ncRNA
mmu_bnc098812	0.0176072	2.77794	up	XR_875582.2	ncRNA
mmu_gnc095836	0.0391327	2.77168	up	XR_870058.2	ncRNA
mmu_bnc096383	0.00292848	2.74089	up	XR_870981.2	ncRNA
mmu_gnc101153	0.0153452	2.73537	up	XR_880023.1	ncRNA
mmu_gnc102232	0.0153221	2.7256	up	XR_882121.2	ncRNA
mmu_gnc089804	0.023296	2.70178	up	XR_383927.2	ncRNA
mmu_bnc100583	0.0114659	2.63847	up	XR_878682.1	ncRNA
mmu_gnc095035	0.016261	2.63195	up	XR_868537.1	ncRNA
mmu_bnc101283	0.000705891	2.63041	up	XR_880238.1	ncRNA
mmu_bnc101553	0.0356343	2.62316	up	XR_880734.2	ncRNA
mmu_gnc078955	0.00682138	2.61852	up	XR_001779078.1	ncRNA
mmu_gnc082702	0.0229337	2.60438	up	XR_001783045.1	ncRNA
mmu_bnc088624	0.00530187	2.59858	up	XR_381054.1	ncRNA
mmu_bnc102052	0.00014353	2.56081	up	XR_881845.2	ncRNA
mmu_bnc032032	0.0364204	2.56037	up	NR_045151.2	ncRNA
mmu_gnc088917	0.0411956	2.5152	up	XR_381724.3	ncRNA
mmu_gnc079959	0.037539	2.50962	up	XR_001780119.1	ncRNA
mmu_gnc097184	0.0064006	2.50001	up	XR_872497.2	ncRNA
mmu_gnc087736	0.0316418	2.49391	up	XR_379080.3	ncRNA
mmu_bnc085802	0.0382397	2.4705	up	XR_374344.1	ncRNA
mmu_gnc097146	0.0486832	2.42239	up	XR_872411.2	ncRNA
mmu_gnc090372	0.0421503	2.39423	up	XR_385109.2	ncRNA
mmu_bnc033769	0.0264483	2.37759	up	NR_136759.1	ncRNA
mmu_gnc096079	0.0294992	2.36415	up	XR_870507.2	ncRNA
mmu_gnc098827	0.00489648	2.35525	up	XR_875604.2	ncRNA
mmu_bnc099672	0.0007578	2.33802	up	XR_877198.1	ncRNA
mmu_bnc101982	0.00462744	2.32951	up	XR_881588.1	ncRNA
mmu_gnc095026	0.00382049	2.30621	up	XR_868518.2	ncRNA
mmu_bnc094379	0.0446606	2.2447	up	XR_867379.1	ncRNA
mmu_gnc100005	0.030338	2.2418	up	XR_877752.1	ncRNA
mmu_gnc031872	0.00365541	2.23534	up	NR_040683.1	ncRNA
mmu_bnc101370	0.0245131	2.23335	up	XR_880371.1	ncRNA
mmu_bnc101232	0.0417425	2.22583	up	XR_880164.1	ncRNA
mmu_gnc100276	0.00042313	2.19575	up	XR_878208.1	ncRNA
mmu_bnc030102	0.0012379	2.18232	up	NR_003282.2	ncRNA
mmu_bnc031714	0.0376839	2.1811	up	NR_040508.1	ncRNA
mmu_gnc084446	0.0221809	2.17607	up	XR_001784908.1	ncRNA
mmu_gnc100277	5.31369e-05	2.17596	up	XR_878209.1	ncRNA
mmu_bnc030904	0.0258476	2.16316	up	NR_030696.1	ncRNA
mmu_bnc098833	0.0298496	2.15976	up	XR_875611.1	ncRNA
mmu_gnc078200	0.00177856	2.14407	up	XR_001778304.1	ncRNA
mmu_gnc082380	0.0447668	2.12215	up	XR_001782685.1	ncRNA
mmu_gnc093691	0.00343895	2.11584	up	XR_866186.1	ncRNA
mmu_gnc032213	0.0108303	2.11508	up	NR_045436.1	ncRNA
mmu_gnc084936	0.0407064	2.09855	up	XR_001785417.1	ncRNA
mmu_gnc079629	0.0373889	2.08442	up	XR_001779778.1	ncRNA
mmu_bnc091308	0.0376077	2.07513	up	XR_387314.1	ncRNA
mmu_bnc079618	0.0194292	2.07012	up	XR_001779767.1	ncRNA
mmu_gnc086540	0.0162613	2.06349	up	XR_376159.2	ncRNA
mmu_gnc093946	0.0132567	2.05339	up	XR_866688.2	ncRNA
mmu_bnc031330	0.00812809	2.05302	up	NR_037987.1	ncRNA
mmu_bnc093690	0.0441215	2.04895	up	XR_866185.2	ncRNA
mmu_gnc078774	0.00748337	2.04619	up	XR_001778894.1	ncRNA
mmu_gnc088233	0.0128114	2.02278	up	XR_380235.2	ncRNA
mmu_bnc084720	0.00283822	2.01733	up	XR_001785191.1	ncRNA
mmu_gnc090851	0.0355353	2.01642	up	XR_386292.2	ncRNA
mmu_bnc089557	0.00497452	2.00038	up	XR_383327.1	ncRNA
mmu_gnc095977	0.0380067	-2.00491	down	XR_870338.1	ncRNA
mmu_bnc083142	0.0185654	-2.02924	down	XR_001783521.1	ncRNA
mmu_gnc081636	0.0449077	-2.0564	down	XR_001781917.1	ncRNA
mmu_gnc087786	0.00814336	-2.05745	down	XR_379168.2	ncRNA
mmu_gnc093692	0.0130756	-2.06668	down	XR_866191.1	ncRNA
mmu_gnc092093	0.0147371	-2.07575	down	XR_389199.3	ncRNA
mmu_gnc080503	0.0319371	-2.08451	down	XR_001780689.1	ncRNA
mmu_bnc087161	0.0224351	-2.08463	down	XR_377732.3	ncRNA
mmu_gnc102466	0.0042785	-2.10391	down	XR_882597.1	ncRNA
mmu_bnc093474	0.0023341	-2.10589	down	XR_865880.2	ncRNA
mmu_gnc080145	0.00314904	-2.11353	down	XR_001780312.1	ncRNA
mmu_bnc091200	0.0444721	-2.11874	down	XR_387100.3	ncRNA
mmu_gnc088445	0.0256459	-2.12451	down	XR_380662.2	ncRNA
mmu_gnc092546	0.00109933	-2.13244	down	XR_390444.3	ncRNA
mmu_gnc099904	0.00681269	-2.13516	down	XR_877553.2	ncRNA
mmu_gnc087785	0.00222904	-2.13941	down	XR_379167.2	ncRNA
mmu_bnc032201	0.0252756	-2.14283	down	NR_045421.1	ncRNA
mmu_bnc081359	0.0365043	-2.14319	down	XR_001781625.1	ncRNA
mmu_gnc099905	0.00568287	-2.19903	down	XR_877554.2	ncRNA
mmu_bnc101399	0.00527638	-2.20348	down	XR_880431.2	ncRNA
mmu_bnc091068	0.00109798	-2.23228	down	XR_386749.2	ncRNA
mmu_gnc090354	0.0480804	-2.24274	down	XR_385069.3	ncRNA
mmu_gnc094868	0.0032729	-2.26322	down	XR_868221.2	ncRNA
mmu_bnc089183	0.0152741	-2.27269	down	XR_382384.2	ncRNA
mmu_gnc099018	0.028099	-2.27344	down	XR_875997.1	ncRNA
mmu_gnc102208	0.00330378	-2.28995	down	XR_882093.1	ncRNA
mmu_bnc080817	0.00993156	-2.31104	down	XR_001781008.1	ncRNA
mmu_gnc095976	0.0121478	-2.31421	down	XR_870337.1	ncRNA
mmu_gnc090395	0.0124099	-2.31617	down	XR_385148.3	ncRNA
mmu_gnc099246	0.0117505	-2.36816	down	XR_876353.2	ncRNA
mmu_gnc099247	0.0305839	-2.4197	down	XR_876354.2	ncRNA
mmu_bnc098765	0.00272825	-2.4954	down	XR_875517.1	ncRNA
mmu_bnc088208	0.0012199	-2.5238	down	XR_380167.3	ncRNA
mmu_gnc090394	0.0198368	-2.54629	down	XR_385146.3	ncRNA
mmu_gnc094867	0.00146047	-2.55392	down	XR_868220.2	ncRNA
mmu_bnc032772	0.0104788	-2.56495	down	NR_073374.1	ncRNA
mmu_bnc101364	0.00286928	-2.61779	down	XR_880363.2	ncRNA
mmu_gnc094921	0.000867086	-2.65059	down	XR_868353.1	ncRNA
mmu_gnc088935	0.0196389	-2.6743	down	XR_381763.2	ncRNA
mmu_bnc033373	0.0400894	-2.79141	down	NR_126426.1	ncRNA
mmu_gnc086805	0.0018294	-2.81266	down	XR_376891.2	ncRNA
mmu_bnc095980	0.0164186	-2.82317	down	XR_870342.1	ncRNA
mmu_bnc031644	0.00112581	-2.98394	down	NR_040438.1	ncRNA
mmu_gnc089980	0.00917143	-3.17596	down	XR_384287.2	ncRNA
mmu_gnc088447	0.0389697	-3.19649	down	XR_380664.1	ncRNA
mmu_bnc083141	0.00534859	-3.24638	down	XR_001783520.1	ncRNA
mmu_bnc089459	0.014141	-3.24656	down	XR_383116.3	ncRNA
mmu_gnc090374	0.0107685	-3.32862	down	XR_385117.3	ncRNA
mmu_gnc083522	0.0367778	-3.35582	down	XR_001783912.1	ncRNA
mmu_bnc030258	0.0334891	-3.36718	down	NR_015527.1	ncRNA
mmu_gnc101179	0.0137312	-3.46055	down	XR_880071.1	ncRNA
mmu_bnc088512	0.00341913	-3.46754	down	XR_380807.1	ncRNA
mmu_bnc086449	0.00513638	-3.53092	down	XR_375975.2	ncRNA
mmu_bnc031724	0.00504491	-3.62622	down	NR_040520.1	ncRNA
mmu_gnc088600	0.00370854	-3.73511	down	XR_380993.2	ncRNA
mmu_bnc031725	0.00472044	-3.78022	down	NR_040520.1	ncRNA
mmu_bnc086112	0.00299635	-4.10495	down	XR_375154.2	ncRNA
mmu_bnc032832	0.000463816	-4.23438	down	NR_077224.1	ncRNA
mmu_gnc095483	0.0175043	-4.4541	down	XR_869372.1	ncRNA
mmu_bnc031654	0.00554652	-4.65273	down	NR_040447.1	ncRNA
mmu_gnc088444	0.0126132	-4.73841	down	XR_380661.2	ncRNA
mmu_bnc088895	0.000453051	-4.88405	down	XR_381684.2	ncRNA
mmu_gnc095484	0.00632226	-4.97443	down	XR_869373.1	ncRNA
mmu_gnc095485	0.0020862	-5.70967	down	XR_869374.1	ncRNA
mmu_gnc101180	0.00626206	-5.73534	down	XR_880072.1	ncRNA
mmu_bnc031806	0.00775579	-5.76885	down	NR_040613.1	ncRNA
mmu_gnc095669	3.92111e-05	-5.91643	down	XR_869820.2	ncRNA
mmu_gnc082239	0.0223713	-6.00948	down	XR_001782538.1	ncRNA
mmu_gnc082238	0.0452848	-6.05434	down	XR_001782537.1	ncRNA
mmu_gnc089640	5.5915e-05	-6.11837	down	XR_383549.2	ncRNA
mmu_gnc095668	3.7818e-05	-6.83621	down	XR_869819.2	ncRNA
mmu_gnc078488	0.00205831	-7.39063	down	XR_001778602.1	ncRNA
mmu_gnc078487	0.000720537	-7.82857	down	XR_001778601.1	ncRNA
mmu_gnc033488	0.0470712	-8.43068	down	NR_130973.1	ncRNA
mmu_gnc033489	0.0451532	-8.52364	down	NR_130974.1	ncRNA
mmu_gnc099925	0.0448035	-9.11101	down	XR_877604.2	ncRNA
mmu_gnc090896	0.0427666	-9.65507	down	XR_386387.2	ncRNA
mmu_bnc030983	0.000785653	-11.5674	down	NR_033301.1	ncRNA
